# Supplementary material for: Directly measuring Fe( iii )-catalyzed SO 2 oxidation rate in single optically levitated droplets
Source: Royal Society of Chemistry journal article supplement (doi:10.1039/d2ea00125j), 2022-12-12
Supplement: d2ea00125j1.pdf [file d2ea00125j1.pdf]

1 **Supplementary Information for**

2 **Directly measuring Fe(III)-catalyzed SO<sub>2</sub> oxidation rate in single levitated**  
3 **droplets**

4 Xue Cao, Zhe Chen, Yu-Xin Liu, Xin-Bo Jing, Lin-Fang Li, Pai Liu\* and Yun-Hong  
5 Zhang\*

6 Institute of Chemical Physics, School of Chemistry and Chemical Engineering,  
7 Beijing Institute of Technology, 100081, Beijing

8 \*Address correspondence to: [pliu@bit.edu.cn](mailto:pliu@bit.edu.cn); [yhz@bit.edu.cn](mailto:yhz@bit.edu.cn)

9 **This document includes:**

10 Figure S1 to S2

11 Table S1 to S2

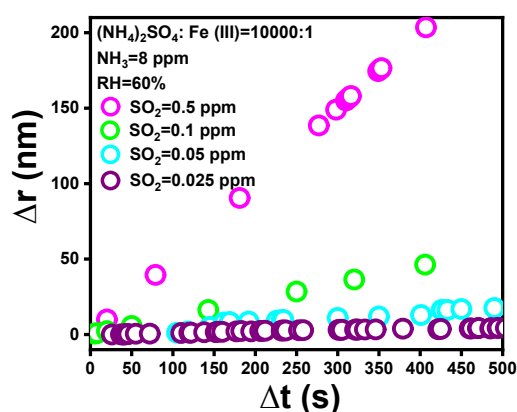

12

13 **Figure S1. The reaction-induced hygroscopic growth of microdroplets.** The  $\text{SO}_2$   
 14 concentration was 25, 50, 100, and 500 ppb. The ambient RH was 60%; Droplet pH  
 15 was buffered at 5.0 with 8 ppm  $\text{NH}_3$  gas. The molar fraction of Fe (III) was maintained  
 16 at 0.01%. At high  $\text{SO}_2$  concentration, the droplets grew at faster speeds, indicating faster  
 17 reactions.

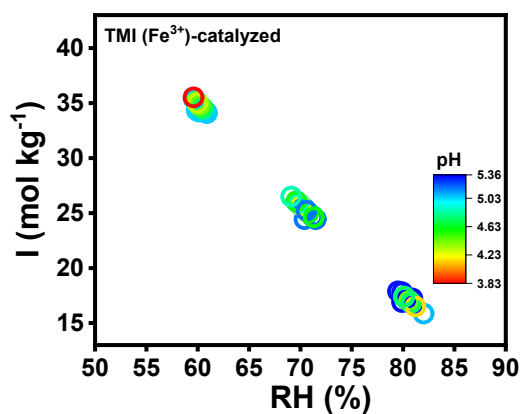

18

19 **Figure S2. The negative relationship between droplet ionic strength  $I$  and ambient**  
 20 **relative humidity conditions.** These datasets were calculated with E-AIM model III,  
 21 with inputs of droplet composition and ambient conditions matching our experiments.  
 22

**Table S1. Experimental conditions and droplet properties at initial state**

| Experiment number | Droplet seed* | RH (%) | SO <sub>2</sub> (ppm) | NH <sub>3</sub> (ppm) | r0 (μm) | Aging time (h) | [S(VI)] (M) | pH   | I (molal) | Fe (III) molar fraction |
|-------------------|---------------|--------|-----------------------|-----------------------|---------|----------------|-------------|------|-----------|-------------------------|
| 1                 | AS            | 60.9   | 1.000                 | 8.00                  | 6.580   | 0              | 6.067       | 5.05 | 34.09     | 0.0001                  |
| 2                 | AS            | 60.8   | 0.500                 | 8.00                  | 6.807   | 0              | 6.076       | 5.05 | 34.20     | 0.0001                  |
| 3                 | AS            | 60.8   | 0.100                 | 8.00                  | 4.849   | 0              | 6.076       | 5.05 | 34.20     | 0.0001                  |
| 4                 | AS            | 60.7   | 0.100                 | 8.00                  | 5.502   | 0              | 6.085       | 5.05 | 34.29     | 0.0001                  |
| 5                 | AS            | 60.6   | 0.050                 | 8.00                  | 5.390   | 0              | 6.094       | 5.05 | 34.39     | 0.0001                  |
| 6                 | AS            | 59.9   | 0.025                 | 8.00                  | 5.149   | 0              | 6.155       | 5.03 | 35.10     | 0.0001                  |
| 7                 | AS            | 59.8   | 0.025                 | 8.00                  | 5.177   | 0              | 6.164       | 5.04 | 35.20     | 0.0001                  |
| 8                 | AS            | 60.1   | 0.025                 | 8.00                  | 4.488   | 0              | 6.137       | 5.04 | 34.23     | 0.0001                  |
| 9                 | AS            | 59.9   | 0.025                 | 8.00                  | 5.148   | 0              | 6.155       | 5.04 | 35.10     | 0.0001                  |
| 10                | AS            | 59.6   | 0.025                 | 8.00                  | 4.901   | 0              | 6.181       | 5.03 | 35.41     | 0.0001                  |
| 11                | AS            | 60.6   | 0.025                 | 8.00                  | 6.115   | 0              | 6.102       | 5.05 | 34.39     | 0.0001                  |
| 12                | AS            | 60.4   | 0.025                 | 8.00                  | 5.910   | 0              | 6.111       | 5.04 | 34.59     | 0.0001                  |
| 13                | AS            | 59.9   | 0.025                 | 8.00                  | 6.530   | 0              | 6.155       | 5.04 | 35.10     | 0.0001                  |
| 14                | AS            | 60.5   | 0.025                 | 8.00                  | 6.570   | 0              | 6.111       | 5.04 | 34.50     | 0.0001                  |
| 15                | AS            | 60.7   | 0.025                 | 8.00                  | 6.016   | 0              | 6.085       | 5.05 | 34.29     | 0.0001                  |
| 16                | AS            | 60.5   | 0.025                 | 8.00                  | 6.999   | 0              | 6.102       | 5.04 | 34.25     | 0.0001                  |
| 17                | AS            | 71.2   | 0.025                 | 8.00                  | 5.065   | 0              | 5.098       | 5.19 | 24.70     | 0.0001                  |
| 18                | AS            | 70.4   | 0.025                 | 8.00                  | 5.197   | 0              | 5.179       | 5.17 | 24.45     | 0.0001                  |
| 19                | AS            | 71.5   | 0.025                 | 8.00                  | 5.153   | 0              | 5.068       | 5.19 | 24.45     | 0.0001                  |
| 20                | AS            | 70.4   | 0.025                 | 8.00                  | 4.254   | 0              | 5.179       | 5.17 | 25.38     | 0.0001                  |
| 21                | AS            | 70.2   | 0.025                 | 8.00                  | 4.711   | 0              | 5.199       | 5.17 | 25.55     | 0.0001                  |
| 22                | AS            | 69.9   | 0.025                 | 8.00                  | 5.350   | 0              | 5.229       | 5.17 | 25.81     | 0.0001                  |
| 23                | AS            | 70.4   | 0.025                 | 8.00                  | 4.346   | 0              | 5.179       | 5.17 | 25.38     | 0.0001                  |
| 24                | AS            | 70     | 0.025                 | 8.00                  | 4.200   | 0              | 5.219       | 5.17 | 25.73     | 0.0001                  |
| 25                | AS            | 71.2   | 0.025                 | 8.00                  | 6.281   | 0              | 5.098       | 5.19 | 24.70     | 0.0001                  |
| 26                | AS            | 71.2   | 0.025                 | 8.00                  | 6.699   | 0              | 5.098       | 5.19 | 24.69     | 0.0001                  |
| 27                | AS            | 80.9   | 0.025                 | 8.00                  | 5.018   | 0              | 4.023       | 5.35 | 16.99     | 0.0001                  |
| 28                | AS            | 80.9   | 0.025                 | 8.00                  | 5.471   | 0              | 4.062       | 5.34 | 17.24     | 0.0001                  |
| 29                | AS            | 79.9   | 0.025                 | 8.00                  | 4.968   | 0              | 4.010       | 5.35 | 16.91     | 0.0001                  |
| 30                | AS            | 79.9   | 0.025                 | 8.00                  | 4.010   | 0              | 4.152       | 5.33 | 17.80     | 0.0001                  |
| 31                | AS            | 79.5   | 0.025                 | 8.00                  | 4.981   | 0              | 4.164       | 5.34 | 17.35     | 0.0001                  |
| 32                | AS            | 80.4   | 0.025                 | 8.00                  | 6.570   | 0              | 4.049       | 5.34 | 17.21     | 0.0001                  |
| 33                | AS            | 80.2   | 0.025                 | 8.00                  | 6.179   | 0              | 4.075       | 5.33 | 17.88     | 0.0001                  |
| 34                | AS            | 80.3   | 0.025                 | 8.00                  | 4.416   | 0              | 4.062       | 5.34 | 17.16     | 0.0001                  |
| 35                | AS+ABS        | 80.3   | 0.025                 | 8.00                  | 5.122   | 0              | 3.981       | 5.34 | 17.24     | 0.0001                  |
| 36                | AS+ABS        | 80.5   | 0.025                 | 8.00                  | 5.060   | 0              | 3.849       | 5.35 | 17.07     | 0.0001                  |
| 37                | AS+ABS        | 80.9   | 0.025                 | 8.00                  | 5.281   | 0              | 4.402       | 5.35 | 16.75     | 0.0001                  |
| 38                | AS+ABS        | 59     | 0.025                 | 8.00                  | 4.546   | 0              | 6.233       | 5.03 | 34.29     | 0.0001                  |
| 39                | AS+ABS        | 60.5   | 0.025                 | 8.00                  | 4.570   | 0              | 6.102       | 5.04 | 33.81     | 0.0001                  |
| 40                | AS+ABS        | 60.4   | 0.025                 | 8.00                  | 3.880   | 0              | 6.111       | 5.04 | 34.20     | 0.0001                  |

| Experiment number | Droplet seed* | RH (%) | SO <sub>2</sub> (ppm) | NH <sub>3</sub> (ppm) | r0 (μm) | Aging time (h) | [S(VI)] (M) | pH   | I (molal) | Fe (III) molar fraction |
|-------------------|---------------|--------|-----------------------|-----------------------|---------|----------------|-------------|------|-----------|-------------------------|
| 41                | AS+ABS        | 60.3   | 0.025                 | 8.00                  | 4.312   | 0              | 6.120       | 5.04 | 34.09     | 0.0001                  |
| 42                | AS+ABS        | 60.3   | 0.025                 | 8.00                  | 4.684   | 0              | 6.120       | 5.04 | 34.59     | 0.0001                  |
| 43                | AS+ABS        | 59.6   | 0.025                 | 8.00                  | 4.859   | 0              | 6.181       | 5.03 | 34.20     | 0.0001                  |
| 44                | AS+ABS        | 59.7   | 0.025                 | 8.00                  | 4.778   | 0              | 6.172       | 5.03 | 34.29     | 0.0001                  |
| 45                | AS+ABS        | 59.9   | 0.025                 | 8.00                  | 4.623   | 0              | 6.155       | 5.04 | 34.59     | 0.0001                  |
| 46                | AS+ABS        | 60     | 0.025                 | 8.00                  | 4.794   | 0              | 6.146       | 5.04 | 34.39     | 0.0001                  |
| 47                | AS+ABS        | 60     | 0.025                 | 8.00                  | 4.757   | 0              | 6.146       | 5.04 | 34.29     | 0.0001                  |
| 48                | AS+ABS        | 59.5   | 0.025                 | 8.00                  | 4.461   | 0              | 6.190       | 5.03 | 34.20     | 0.0001                  |
| 49                | AS+ABS        | 59.5   | 0.025                 | 8.00                  | 4.036   | 0              | 6.190       | 5.03 | 35.10     | 0.0001                  |
| 50                | AS+ABS        | 59.6   | 0.025                 | 8.00                  | 7.082   | 0              | 6.181       | 5.03 | 35.30     | 0.0001                  |
| 51                | AS+ABS        | 59.9   | 0.025                 | 8.00                  | 7.028   | 0              | 6.190       | 5.03 | 35.10     | 0.0001                  |
| 52                | AS+ABS        | 59.6   | 0.025                 | 8.00                  | 7.091   | 0              | 6.181       | 5.03 | 35.30     | 0.0001                  |
| 53                | AS+ABS        | 60     | 0.025                 | 8.00                  | 7.078   | 0              | 6.146       | 5.04 | 34.00     | 0.0001                  |
| 54                | AS+ABS        | 59.9   | 0.025                 | 8.00                  | 6.997   | 0              | 6.190       | 5.03 | 35.10     | 0.0001                  |
| 55                | AS+ABS        | 60     | 0.025                 | 8.00                  | 6.987   | 0              | 6.146       | 5.04 | 34.00     | 0.0001                  |
| 56                | AS+ABS        | 59.9   | 0.025                 | 8.00                  | 6.997   | 0              | 6.190       | 5.03 | 35.10     | 0.0001                  |
| 57                | AS+ABS        | 61.2   | 0.025                 | 8.00                  | 5.258   | 0              | 6.041       | 5.05 | 33.81     | 0.00001                 |
| 58                | AS+ABS        | 60.6   | 0.025                 | 8.00                  | 5.180   | 0              | 6.067       | 5.05 | 34.22     | 0.00001                 |
| 59                | AS+ABS        | 59.9   | 0.025                 | 8.00                  | 5.235   | 0              | 6.155       | 5.04 | 35.10     | 0.00001                 |
| 60                | AS+ABS        | 60.2   | 0.025                 | 8.00                  | 5.116   | 0              | 6.129       | 5.04 | 34.80     | 0.00001                 |
| 61                | AS+ABS        | 59.3   | 0.025                 | 8.00                  | 5.189   | 0              | 6.207       | 5.03 | 35.72     | 0.00001                 |
| 62                | AS+ABS        | 59.7   | 0.025                 | 8.00                  | 5.181   | 0              | 6.172       | 5.03 | 35.31     | 0.00001                 |
| 63                | AS+ABS        | 60.1   | 0.025                 | 8.00                  | 5.175   | 0              | 6.137       | 5.04 | 34.90     | 0.00001                 |
| 64                | AS+ABS        | 59.7   | 0.025                 | 8.00                  | 6.088   | 0              | 6.172       | 5.03 | 35.31     | 0.00001                 |
| 65                | AS+ABS        | 59.9   | 0.025                 | 8.00                  | 5.181   | 0              | 6.155       | 5.04 | 35.10     | 0.000001                |
| 66                | AS+ABS        | 59.9   | 0.025                 | 8.00                  | 5.309   | 0              | 6.155       | 5.04 | 35.10     | 0.000001                |
| 67                | AS+ABS        | 60.1   | 0.025                 | 8.00                  | 5.506   | 0              | 6.155       | 5.04 | 34.90     | 0.000001                |
| 68                | AS+ABS        | 59.7   | 0.025                 | 8.00                  | 5.333   | 0              | 6.172       | 5.03 | 35.31     | 0.001                   |
| 69                | AS+ABS        | 59.5   | 0.025                 | 8.00                  | 5.982   | 0              | 6.190       | 5.03 | 35.56     | 0.001                   |
| 70                | AS+ABS        | 59.7   | 0.025                 | 8.00                  | 6.048   | 0              | 6.172       | 5.03 | 35.35     | 0.001                   |
| 71                | AS+ABS        | 60.1   | 0.025                 | 8.00                  | 4.320   | 0              | 6.137       | 5.04 | 34.95     | 0.001                   |
| 72                | AS+ABS        | 59.9   | 0.025                 | 8.00                  | 5.249   | 0              | 6.155       | 5.04 | 35.15     | 0.001                   |
| 73                | AS+ABS        | 60.4   | 0.025                 | 8.00                  | 5.158   | 12             | 6.111       | 5.04 | 34.60     | 0.0001                  |
| 74                | AS+ABS        | 59.3   | 0.025                 | 8.00                  | 5.903   | 12             | 6.207       | 5.03 | 35.72     | 0.0001                  |
| 75                | AS+ABS        | 59.7   | 0.025                 | 8.00                  | 4.923   | 12             | 6.172       | 5.03 | 35.31     | 0.0001                  |
| 76                | AS+ABS        | 60     | 0.025                 | 8.00                  | 5.307   | 12             | 6.146       | 5.04 | 35.01     | 0.0001                  |
| 77                | AS+ABS        | 59.9   | 0.025                 | 8.00                  | 5.254   | 12             | 6.155       | 5.04 | 35.11     | 0.0001                  |
| 78                | AS+ABS        | 60.1   | 0.025                 | 8.00                  | 5.203   | 12             | 6.137       | 5.04 | 34.90     | 0.0001                  |
| 79                | AS+ABS        | 60.7   | 0.025                 | 8.00                  | 6.407   | 36             | 6.085       | 5.05 | 34.30     | 0.0001                  |
| 80                | AS+ABS        | 59.7   | 0.025                 | 8.00                  | 5.261   | 36             | 6.172       | 5.03 | 35.31     | 0.0001                  |
| 81                | AS+ABS        | 59.7   | 0.025                 | 8.00                  | 5.158   | 36             | 6.172       | 5.03 | 35.31     | 0.0001                  |

| Experiment number | Droplet seed* | RH (%) | SO <sub>2</sub> (ppm) | NH <sub>3</sub> (ppm) | r0 (μm) | Aging time (h) | [S(VI)] (M) | pH   | I (molal) | Fe (III) molar fraction |
|-------------------|---------------|--------|-----------------------|-----------------------|---------|----------------|-------------|------|-----------|-------------------------|
| 82                | AS+ABS        | 59.6   | 0.025                 | 8.00                  | 5.183   | 36             | 6.181       | 5.03 | 35.42     | 0.0001                  |
| 83                | AS+ABS        | 59.7   | 0.025                 | 8.00                  | 5.061   | 36             | 6.172       | 5.03 | 35.31     | 0.0001                  |
| 84                | AS+ABS        | 59.7   | 0.025                 | 8.00                  | 5.115   | 48             | 6.172       | 5.03 | 35.31     | 0.0001                  |
| 85                | AS+ABS        | 59.4   | 0.025                 | 8.00                  | 5.284   | 48             | 6.198       | 5.03 | 35.62     | 0.0001                  |
| 86                | AS+ABS        | 59.6   | 0.025                 | 8.00                  | 5.018   | 48             | 6.181       | 5.03 | 35.42     | 0.0001                  |
| 87                | AS+ABS        | 60.7   | 0.025                 | 8.00                  | 5.306   | 48             | 6.085       | 5.05 | 34.30     | 0.0001                  |
| 88                | AS+ABS        | 60.9   | 0.025                 | 8.00                  | 5.372   | 48             | 6.067       | 5.05 | 34.10     | 0.0001                  |

24 \*AS denotes ammonium sulfate; ABS, ammonium bisulfate

25

Table S2. Droplet hygroscopic growth rate and sulfate formation rate

| Experiment number | Reaction Product | $dr/dt$<br>( $\text{nm s}^{-1}$ ) * | $R_{S(VI)}$<br>( $10^{-15} \text{ mol s}^{-1}$ ) | $\Gamma_{SO_2}$<br>( $10^{-3}$ ) | $R_{S(VI)}/P_{SO_2}/A$<br>( $10^{-16} \text{ mol s}^{-1} \text{ ppm}^{-1} \text{ um}^{-2}$ ) |
|-------------------|------------------|-------------------------------------|--------------------------------------------------|----------------------------------|----------------------------------------------------------------------------------------------|
| 1                 | AS               | 0.939±0.0002                        | 3.100±0.076                                      | 1.769±0.0435                     | 0.057±0.0014                                                                                 |
| 2                 | AS               | 0.552±0.0002                        | 1.953±0.0683                                     | 2.083±0.0728                     | 0.067±0.0023                                                                                 |
| 3                 | AS               | 0.114±0.0004                        | 0.205±0.001                                      | 2.151±0.0079                     | 0.069±0.0003                                                                                 |
| 4                 | AS               | 0.103±0.0004                        | 0.238±0.001                                      | 2.151±0.0079                     | 0.063±0.0002                                                                                 |
| 5                 | AS               | 0.021±0.0003                        | 0.046±0.001                                      | 0.776±0.0110                     | 0.025±0.0003                                                                                 |
| 6                 | AS               | 0.013±0.0002                        | 0.0267±0.000                                     | 0.994±0.0123                     | 0.031±0.0004                                                                                 |
| 7                 | AS               | 0.013±0.0000                        | 0.0262±0.000                                     | 0.965±0.0034                     | 0.031±0.0001                                                                                 |
| 8                 | AS               | 0.0133±0.0002                       | 0.0207±0.000                                     | 1.014±0.0144                     | 0.033±0.0005                                                                                 |
| 9                 | AS               | 0.013±0.0002                        | 0.027±0.0003                                     | 0.994±0.0123                     | 0.032±0.0004                                                                                 |
| 10                | AS               | 0.011±0.0001                        | 0.021±0.0001                                     | 0.860±0.0040                     | 0.028±0.0001                                                                                 |
| 11                | AS               | 0.017±0.0002                        | 0.047±0.0005                                     | 1.251±0.0131                     | 0.040±0.0004                                                                                 |
| 12                | AS               | 0.010±0.0002                        | 0.028±0.0004                                     | 0.782±0.0119                     | 0.025±0.0004                                                                                 |
| 13                | AS               | 0.012±0.0001                        | 0.040±0.0004                                     | 0.925±0.0102                     | 0.030±0.0003                                                                                 |
| 14                | AS               | 0.015±0.0002                        | 0.050±0.0006                                     | 1.134±0.0139                     | 0.037±0.0004                                                                                 |
| 15                | AS               | 0.0153±0.0001                       | 0.042±0.0014                                     | 1.153±0.0381                     | 0.037±0.0012                                                                                 |
| 16                | AS               | 0.010±0.0001                        | 0.038±0.0005                                     | 0.769±0.0093                     | 0.025±0.0003                                                                                 |
| 17                | AS               | 0.010±0.0001                        | 0.017±0.0002                                     | 0.658±0.0063                     | 0.061±0.0006                                                                                 |
| 18                | AS               | 0.016±0.0003                        | 0.028±0.0005                                     | 1.016±0.0188                     | 0.050±0.0023                                                                                 |
| 19                | AS               | 0.007±0.0001                        | 0.011±0.0001                                     | 0.414±0.0050                     | 0.039±0.0006                                                                                 |
| 20                | AS               | 0.007±0.0000                        | 0.009±0.0001                                     | 0.483±0.0031                     | 0.019±0.0004                                                                                 |
| 21                | AS               | 0.006±0.0001                        | 0.008±0.0001                                     | 0.352±0.0059                     | 0.018±0.0002                                                                                 |
| 22                | AS               | 0.006±0.0001                        | 0.011±0.0002                                     | 0.386±0.0076                     | 0.013±0.0004                                                                                 |
| 23                | AS               | 0.011±0.0001                        | 0.013±0.0001                                     | 0.688±0.0059                     | 0.004±0.0004                                                                                 |
| 24                | AS               | 0.006±0.0001                        | 0.007±0.0001                                     | 0.383±0.0074                     | 0.021±0.0002                                                                                 |
| 25                | AS               | 0.006±0.0001                        | 0.032±0.0013                                     | 0.348±0.0071                     | 0.033±0.0006                                                                                 |
| 26                | AS               | 0.011±0.0004                        | 0.014±0.0003                                     | 0.707±0.0279                     | 0.013±0.0002                                                                                 |
| 27                | AS               | 0.011±0.0003                        | 0.013±0.0003                                     | 0.530±0.0136                     | 0.016±0.0001                                                                                 |
| 28                | AS               | 0.013±0.0002                        | 0.020±0.0003                                     | 0.673±0.0100                     | 0.011±0.0002                                                                                 |
| 29                | AS               | 0.016±0.0002                        | 0.019±0.0003                                     | 0.777±0.0122                     | 0.012±0.0001                                                                                 |
| 30                | AS               | 0.009±0.0004                        | 0.007±0.0003                                     | 0.449±0.0186                     | 0.022±0.0002                                                                                 |
| 31                | AS               | 0.016±0.0007                        | 0.017±0.0002                                     | 0.451±0.0047                     | 0.012±0.0002                                                                                 |
| 32                | AS               | 0.013±0.0002                        | 0.011±0.0003                                     | 0.540±0.0147                     | 0.011±0.0002                                                                                 |
| 33                | AS               | 0.009±0.0001                        | 0.014±0.0009                                     | 0.554±0.0360                     | 0.023±0.0009                                                                                 |
| 34                | AS               | 0.011±0.0003                        | 0.028±0.0005                                     | 0.639±0.0110                     | 0.005±0.0001                                                                                 |
| 35                | AS               | 0.008±0.0006                        | 0.010±0.0008                                     | 0.394±0.0315                     | 0.013±0.0010                                                                                 |
| 36                | AS               | 0.009±0.0005                        | 0.012±0.0006                                     | 0.446±0.0238                     | 0.014±0.0008                                                                                 |
| 37                | AS               | 0.008±0.0001                        | 0.011±0.0001                                     | 0.401±0.0049                     | 0.013±0.0002                                                                                 |
| 38                | AS               | 0.016±0.0001                        | 0.0261±0.0001                                    | 1.247±0.0052                     | 0.040±0.0002                                                                                 |
| 39                | AS               | 0.014±0.0001                        | 0.0227±0.0002                                    | 1.077±0.0086                     | 0.035±0.0003                                                                                 |
| 40                | AS               | 0.013±0.0003                        | 0.0148±0.0038                                    | 0.972±0.2475                     | 0.031±0.0080                                                                                 |

| Experiment number | Reaction Product | dr/dt (nm s <sup>-1</sup> ) * | R <sub>S(VI)</sub> (10 <sup>-15</sup> mol s <sup>-1</sup> ) | Γ <sub>SO<sub>2</sub></sub> (10 <sup>-3</sup> ) | R <sub>S(VI)</sub> /P <sub>SO<sub>2</sub></sub> /A (10 <sup>-16</sup> mol s <sup>-1</sup> ppm <sup>-1</sup> um <sup>-2</sup> ) |
|-------------------|------------------|-------------------------------|-------------------------------------------------------------|-------------------------------------------------|--------------------------------------------------------------------------------------------------------------------------------|
| 41                | AS               | 0.013±0.0001                  | 0.0189±0.0001                                               | 1.004±0.0059                                    | 0.032±0.0002                                                                                                                   |
| 42                | AS               | 0.013±0.0002                  | 0.0214±0.0004                                               | 0.966±0.0170                                    | 0.031±0.0005                                                                                                                   |
| 43                | AS               | 0.009±0.0005                  | 0.0165±0.0010                                               | 0.691±0.0412                                    | 0.022±0.0013                                                                                                                   |
| 44                | AS               | 0.011±0.0001                  | 0.0202±0.0002                                               | 0.874±0.0065                                    | 0.028±0.0002                                                                                                                   |
| 45                | AS               | 0.011±0.0001                  | 0.0188±0.0001                                               | 0.872±0.0049                                    | 0.028±0.0002                                                                                                                   |
| 46                | AS               | 0.019±0.0001                  | 0.0330±0.0001                                               | 1.420±0.0057                                    | 0.046±0.0002                                                                                                                   |
| 47                | AS               | 0.012±0.0002                  | 0.0203±0.0004                                               | 0.886±0.0182                                    | 0.029±0.0006                                                                                                                   |
| 48                | AS               | 0.014±0.0001                  | 0.0221±0.0002                                               | 1.100±0.0093                                    | 0.035±0.0003                                                                                                                   |
| 49                | AS               | 0.012±0.0008                  | 0.0151±0.0010                                               | 0.915±0.0612                                    | 0.029±0.0020                                                                                                                   |
| 50                | AS               | 0.015±0.0001                  | 0.0592±0.0006                                               | 1.167±0.0112                                    | 0.038±0.0004                                                                                                                   |
| 51                | AS               | 0.010±0.0005                  | 0.0384±0.0017                                               | 0.769±0.0347                                    | 0.025±0.0011                                                                                                                   |
| 52                | AS               | 0.014±0.0001                  | 0.0535±0.0001                                               | 1.052±0.0027                                    | 0.034±0.0001                                                                                                                   |
| 53                | AS               | 0.014±0.0004                  | 0.0534±0.0016                                               | 1.054±0.0311                                    | 0.034±0.0010                                                                                                                   |
| 54                | AS               | 0.011±0.0004                  | 0.0427±0.0017                                               | 0.861±0.0338                                    | 0.028±0.0011                                                                                                                   |
| 55                | AS               | 0.012±0.0001                  | 0.0437±0.0003                                               | 0.886±0.0058                                    | 0.029±0.0002                                                                                                                   |
| 56                | AS               | 0.016±0.0003                  | 0.0602±0.0011                                               | 1.215±0.0224                                    | 0.039±0.0007                                                                                                                   |
| 57                | AS               | 0.011±0.0001                  | 0.0227±0.0002                                               | 0.810±0.0060                                    | 0.026±0.0002                                                                                                                   |
| 58                | AS               | 0.011±0.0001                  | 0.0219±0.0001                                               | 0.807±0.0052                                    | 0.026±0.0002                                                                                                                   |
| 59                | AS               | 0.016±0.0001                  | 0.0339±0.0001                                               | 1.223±0.0047                                    | 0.039±0.0001                                                                                                                   |
| 60                | AS               | 0.012±0.0001                  | 0.0250±0.0001                                               | 0.944±0.0043                                    | 0.030±0.0001                                                                                                                   |
| 61                | AS               | 0.010±0.0001                  | 0.0210±0.0001                                               | 0.771±0.0043                                    | 0.025±0.0001                                                                                                                   |
| 62                | AS               | 0.011±0.0002                  | 0.0237±0.0004                                               | 0.874±0.0130                                    | 0.028±0.0004                                                                                                                   |
| 63                | AS               | 0.009±0.0003                  | 0.0192±0.0005                                               | 0.709±0.0196                                    | 0.023±0.0006                                                                                                                   |
| 64                | AS               | 0.012±0.0002                  | 0.0354±0.0007                                               | 0.943±0.0175                                    | 0.030±0.0006                                                                                                                   |
| 65                | AS               | 0.011±0.0001                  | 0.0235±0.0001                                               | 0.864±0.0048                                    | 0.028±0.0002                                                                                                                   |
| 66                | AS               | 0.015±0.0001                  | 0.0336±0.0002                                               | 1.178±0.0068                                    | 0.038±0.0002                                                                                                                   |
| 67                | AS               | 0.011±0.0002                  | 0.0256±0.0005                                               | 0.833±0.0155                                    | 0.027±0.0005                                                                                                                   |
| 68                | AS               | 0.013±0.0002                  | 0.0296±0.0004                                               | 1.027±0.0155                                    | 0.033±0.0005                                                                                                                   |
| 69                | AS               | 0.013±0.0002                  | 0.0362±0.0004                                               | 1.000±0.0119                                    | 0.032±0.0004                                                                                                                   |
| 70                | AS               | 0.014±0.0001                  | 0.0389±0.0004                                               | 1.051±0.0096                                    | 0.034±0.0003                                                                                                                   |
| 71                | AS               | 0.015±0.0001                  | 0.0214±0.0001                                               | 1.136±0.0064                                    | 0.037±0.0002                                                                                                                   |
| 72                | AS               | 0.014±0.0002                  | 0.0305±0.0005                                               | 1.093±0.0180                                    | 0.035±0.0006                                                                                                                   |
| 73                | AS               | 0.006±0.0004                  | 0.0118±0.0007                                               | 0.440±0.0267                                    | 0.014±0.0009                                                                                                                   |
| 74                | AS               | 0.005±0.0002                  | 0.0139±0.0004                                               | 0.393±0.0124                                    | 0.013±0.0004                                                                                                                   |
| 75                | AS               | 0.006±0.0001                  | 0.0111±0.0002                                               | 0.452±0.0080                                    | 0.015±0.0003                                                                                                                   |
| 76                | AS               | 0.004±0.0002                  | 0.0091±0.0005                                               | 0.321±0.0182                                    | 0.010±0.0006                                                                                                                   |
| 77                | AS               | 0.005±0.0002                  | 0.0105±0.0003                                               | 0.375±0.0121                                    | 0.012±0.0004                                                                                                                   |
| 78                | AS               | 0.005±0.0002                  | 0.0094±0.0004                                               | 0.343±0.0153                                    | 0.011±0.0005                                                                                                                   |
| 79                | AS               | 0.003±0.0003                  | 0.0094±0.0008                                               | 0.227±0.0202                                    | 0.007±0.0007                                                                                                                   |
| 80                | AS               | 0.003±0.0002                  | 0.0073±0.0004                                               | 0.261±0.0127                                    | 0.008±0.0004                                                                                                                   |
| 81                | AS               | 0.003±0.0001                  | 0.0068±0.0003                                               | 0.252±0.0114                                    | 0.008±0.0004                                                                                                                   |
| 82                | AS               | 0.004±0.0002                  | 0.0075±0.0003                                               | 0.276±0.0126                                    | 0.009±0.0004                                                                                                                   |

| <b>Experiment number</b> | <b>Reaction Product</b> | <b>dr/dt (nm s<sup>-1</sup>) *</b> | <b>R<sub>S(VI)</sub> (10<sup>-15</sup> mol s<sup>-1</sup>)</b> | <b>Γ<sub>SO<sub>2</sub></sub> (10<sup>-3</sup>)</b> | <b>R<sub>S(VI)</sub>/P<sub>SO<sub>2</sub></sub>/A (10<sup>-16</sup> mol s<sup>-1</sup> ppm<sup>-1</sup> μm<sup>-2</sup>)</b> |
|--------------------------|-------------------------|------------------------------------|----------------------------------------------------------------|-----------------------------------------------------|------------------------------------------------------------------------------------------------------------------------------|
| 83                       | AS                      | 0.003±0.0002                       | 0.0058±0.0003                                                  | 0.222±0.0122                                        | 0.007±0.0004                                                                                                                 |
| 84                       | AS                      | 0.003±0.0001                       | 0.0055±0.0002                                                  | 0.207±0.0078                                        | 0.007±0.0003                                                                                                                 |
| 85                       | AS                      | 0.003±0.0003                       | 0.0054±0.0008                                                  | 0.193±0.0267                                        | 0.006±0.0009                                                                                                                 |
| 86                       | AS                      | 0.002±0.0001                       | 0.0043±0.0001                                                  | 0.169±0.0041                                        | 0.005±0.0001                                                                                                                 |
| 87                       | AS                      | 0.003±0.0001                       | 0.0055±0.0002                                                  | 0.194±0.0082                                        | 0.006±0.0003                                                                                                                 |
| 88                       | AS                      | 0.002±0.0001                       | 0.0051±0.0002                                                  | 0.173±0.0072                                        | 0.006±0.0002                                                                                                                 |

27 \* Error represents the 95% confidence interval values of  $dr_p/dt$ , which were obtained by linear fitting  $r_p(t)$  data.
